# Supplementary material
Source: PubMed Central journal article supplement (PMC8049981)
Supplement: NIHMS1671495-supplement-2.pdf [file NIHMS1671495-supplement-2.pdf]

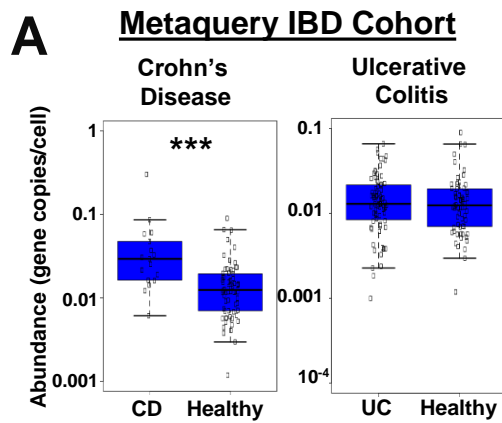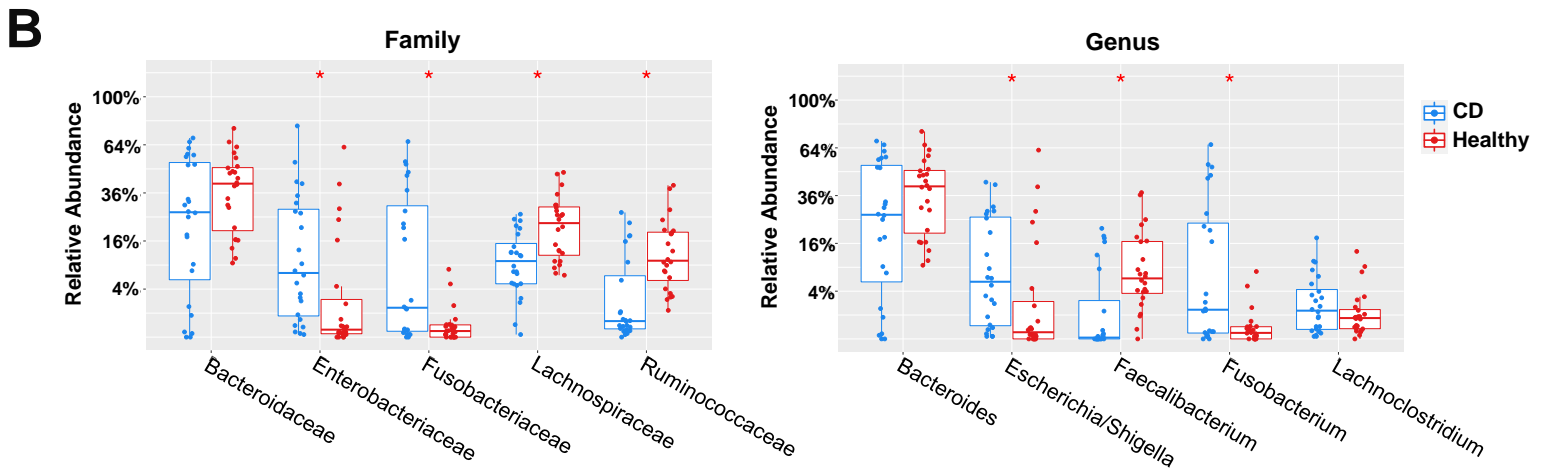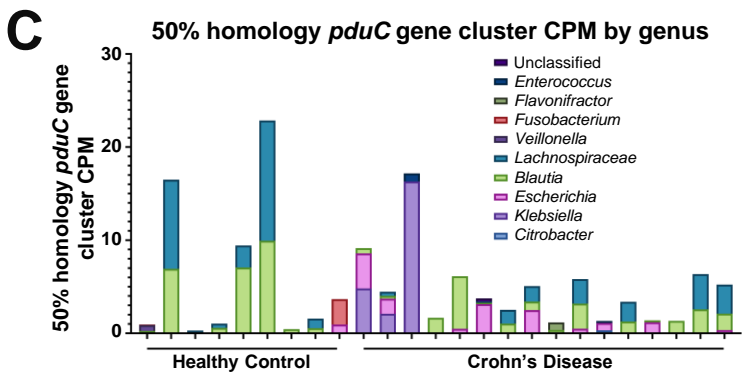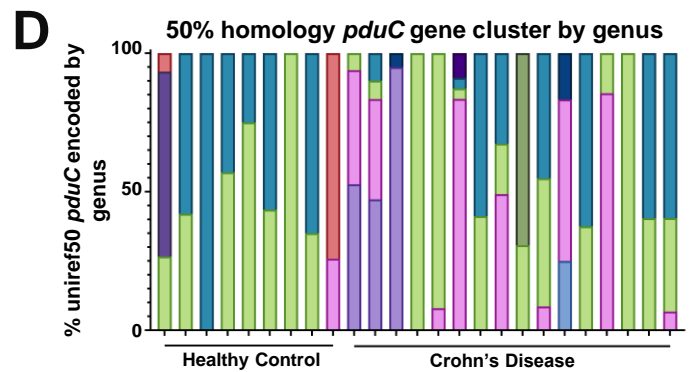

**Fig S1. *pduC* is enriched in CD microbiome, related to Figure 1.** **A.** Gene abundance of *pduC* from patients with Crohn's disease (CD), ulcerative colitis (UC), or healthy controls from metaquery database (McGovern et al., 2010). **B.** Composition of fecal microbiome from 16S rRNA sequencing of healthy controls (HC, N=24) and Crohn's disease (CD, N=24). Top five abundant families and genus are shown. \* $p < 0.05$  by Mann-Whitney. **C.** Read counts per million of *pduC* based on 50% homology. Reads encoded by genus are indicated by color. **D.** Percentage of *pduC* reads encoded by genus.

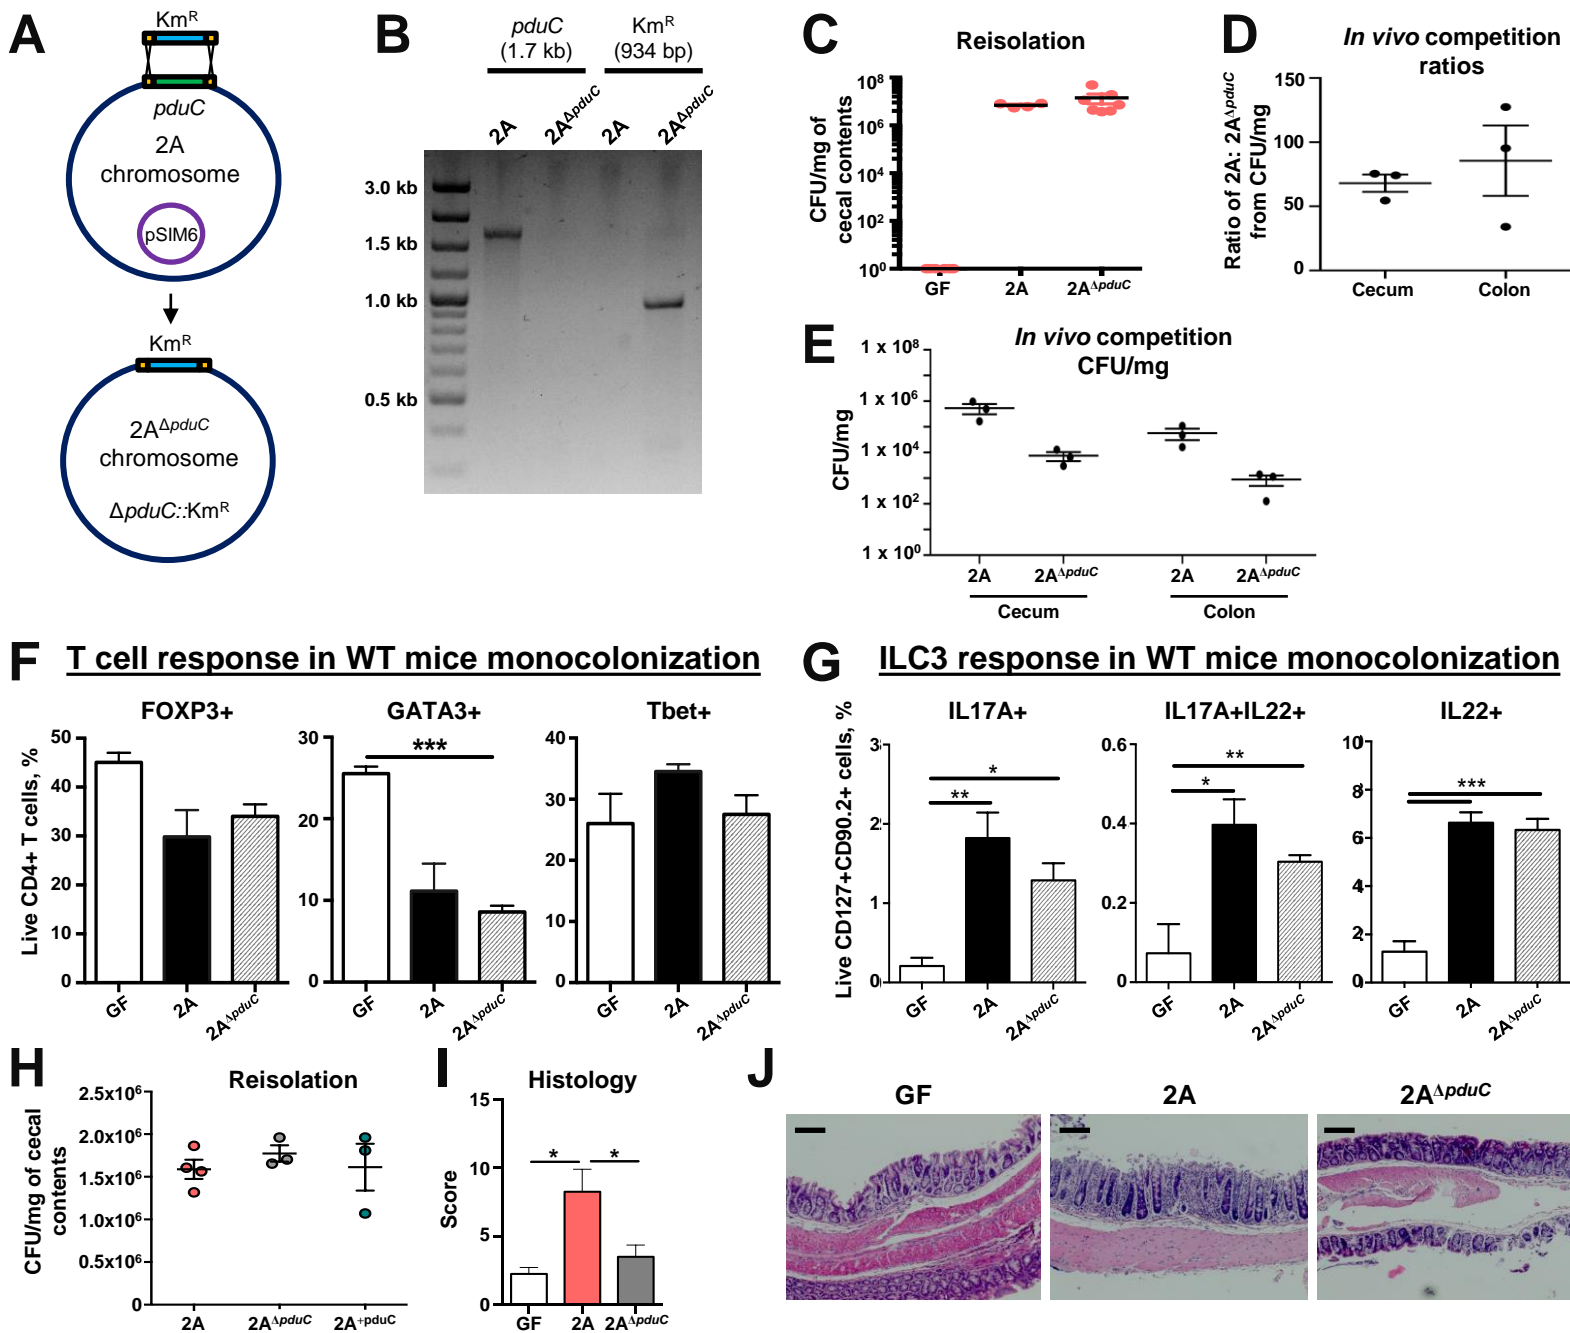

**Fig S2. CD-derived AIEC induces intestinal ROR $\gamma$ t immunity and inflammation in a *pduC*-dependent manner, related to Figure 1. A.** Lambda red recombination was used to generate a CD-derived, *pduC*-deficient AIEC mutant ( $2A^{\Delta pduC}$ ) **B.** 1.7% agarose DNA gel for PCR amplified *pduC* and kanamycin resistance cassette ( $Km^R$ ) in 2A and  $2A^{\Delta pduC}$ . **C.** Germ-free C57BL/6 mice were colonized with  $2 \times 10^9$  CFU AIEC 2A or  $2A^{\Delta pduC}$ . Analysis of CFU / mg colonic contents at day 15 post-colonization is shown. Each dot represents an individual mouse from one of two total experiments. Error bars represent SEM. \* $p < 0.05$ , \*\* $p < 0.01$  ANOVA. **D, E.** *In vivo* competitive ratios (**D**) and CFU (**E**) of wildtype AIEC 2A to  $2A^{\Delta pduC}$ . Ratios were calculated based on CFU/mg counts from differential, selective plating on MacConkey agar with and without Kanamycin. **F, G.** Germ-free C57BL/6 mice were colonized with  $2 \times 10^9$  CFU AIEC 2A or  $2A^{\Delta pduC}$  and analyzed after 15 days. Percentage of colonic FoxP3+, GATA3+, and Tbet+ CD4+ T cells was evaluated (**F**). Percentage of colonic IL17A+, IL17A/IL22+ and IL22+ CD127+CD90.2+ ILC cells was evaluated (**G**). Bar graphs represent geometric mean of at least 3 mice per group from one of three total experiments. Error bars represent SEM. \* $p < 0.05$ , \*\* $p < 0.01$  ANOVA. **H-J.** Germ-free *Rag1*-deficient mice were colonized with  $2 \times 10^9$  CFU of AIEC 2A,  $2A^{\Delta pduC}$  or complement  $2A^{\Delta pduC} + pduC$ . One week after colonization, mice received 500,000 FACS-sorted, naïve CD4+ T cells intraperitoneally. Analysis of CFU / mg colonic contents at week 10 post-T cell transfer is shown (**H**). Proximal colon was collected at week 10 for histopathological analysis (**I**). Representative colonic histology images are shown. Scale bars: 100 $\mu$ m (**J**).

### T cell transfer colitis

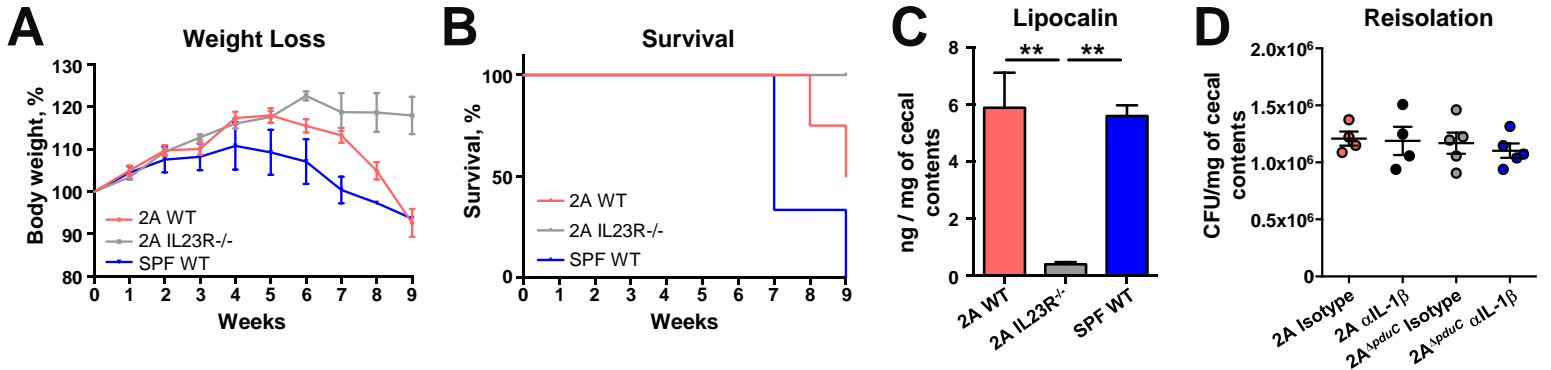

### ROR $\gamma$ t inhibition during DSS colitis

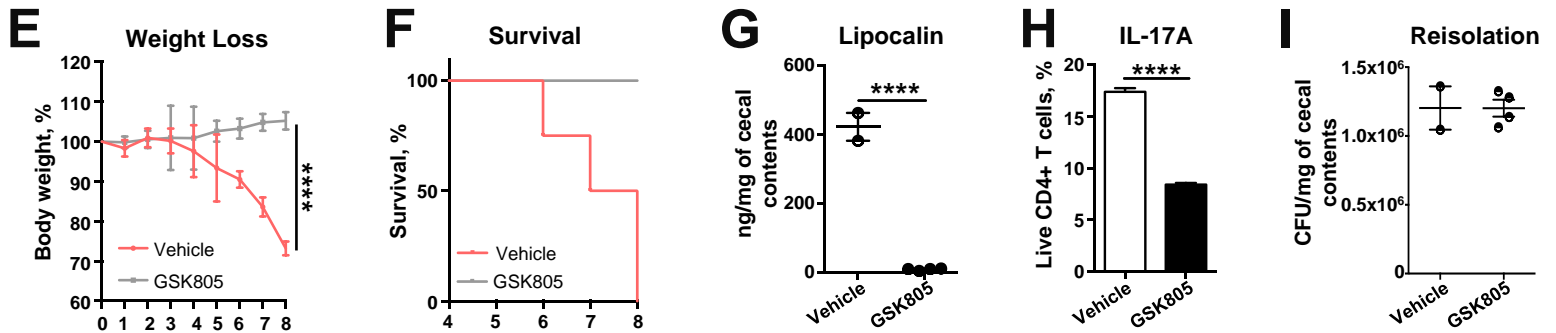

**Fig S3. CD-derived AIEC induces Th17-dependent intestinal inflammation, related to Figures 1 and 2.** **A-C.** Germ-free *Rag1*-deficient mice were colonized with  $2 \times 10^9$  CFU of AIEC 2A. One week after colonization, mice received 500,000 FACS-sorted, naïve WT or *il23r*-deficient CD4<sup>+</sup> T cells intraperitoneally. Mice were monitored for weight loss (**A**) and survival (**B**) for 9 weeks. Lipocalin in cecal contents was measured by ELISA at 9 weeks (**C**). Graphs represent geometric mean of 4-5 mice per group. Error bars represent SEM. \*\* $p < 0.01$  ANOVA. **D.** Germ-free C57BL/6 *Il10*-deficient mice were colonized with  $2 \times 10^9$  CFU of AIEC 2A or 2A<sup>ΔpduC</sup>. Ten days after colonization, mice were exposed to 2% dextran sodium sulfate *ad libitum* for 7 days. Mice were treated intraperitoneally with anti-IL1 $\beta$  or isotype control on days -2, 0, 2, 4, and 6 of DSS treatment. Bacterial reisolation from cecal contents is shown. Each dot represents an individual mouse from one of two total experiments. Error bars represent SEM. \* $p < 0.05$ , t-test. **E-I.** Germ-free C57BL/6 *Il10*-deficient mice were colonized with  $2 \times 10^9$  CFU of AIEC 2A. Ten days after colonization, mice were exposed to 2% dextran sodium sulfate *ad libitum* for 7 days. Mice were treated daily with ROR $\gamma$ t inhibitor GSK805 or vehicle control. Weight loss (**E**), percent survival (**F**), levels of lipocalin in cecal contents (**G**) and colonic IL17A-producing CD4<sup>+</sup> T cells (**H**), and bacterial reisolation (**I**) are shown. Graphs show at least 4 mice from one of two total experiments. Error bars represent SEM. \*\*\*\* $p < 0.001$  ANOVA.

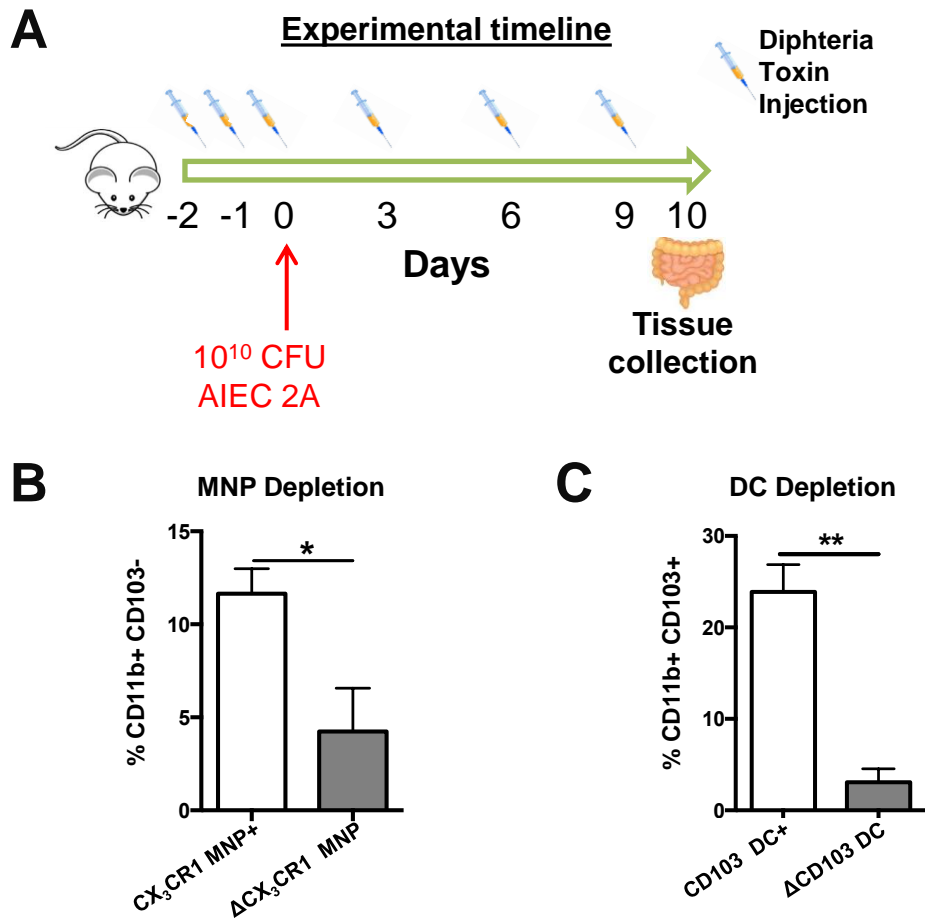

**FIGURE S4. Antigen presenting cell depletion strategy, related to Figure 3.** **A.** 4-week-old littermate *Cx3cr1-LSL-DTR* (labelled CX<sub>3</sub>CR1 MNP+) and *Itgax-cre Cx3cr1-LSL-DTR* (labeled ΔCX<sub>3</sub>CR1 MNP) mice were treated with diphtheria toxin (DT) before and during colonization with 10<sup>10</sup> CFU CD-derived AIEC 2A. 4-week-old littermate *Lang-DTREGFP* mice were treated with DT (labeled ΔCD103 DC) or PBS (labeled CD103 DC+) before and during colonization with AIEC 2A. **B, C.** Flow cytometry of ileal live, CD11c+ MHCII+ cells was used to evaluate depletion of CD11b+CD103- (MNPs) in **B** and CD11b+CD103+ (DCs) in **C**. Bar graphs represent geometric mean of at least 3-4 mice per group from one of three total experiments. Error bars represent SEM. \**p*<0.05, \*\**p*<0.01, ANOVA.

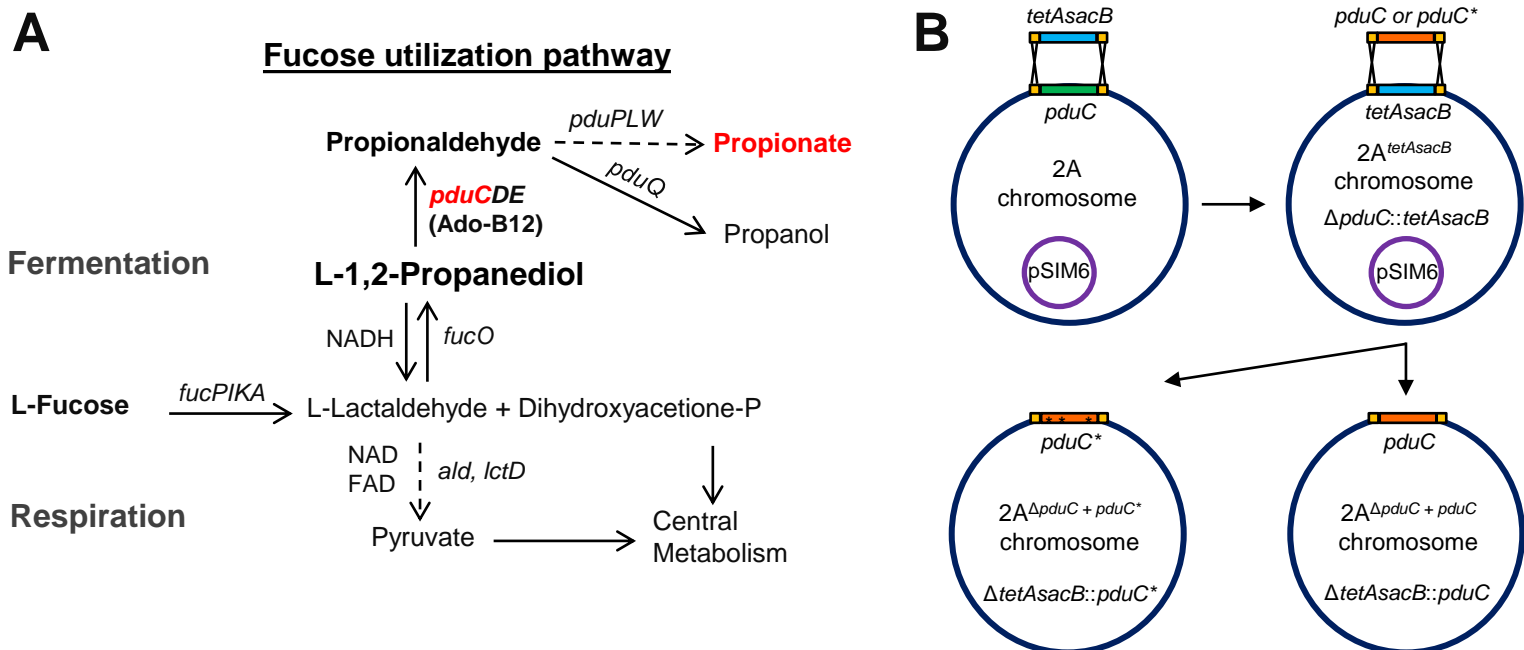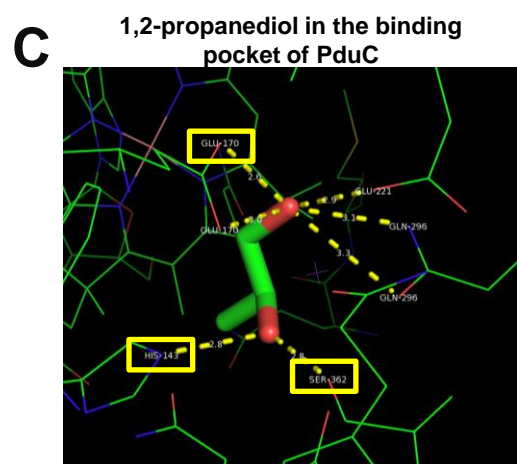

**Fig S5. PduC metabolic activity is required for T cell-dependent inflammatory colitis, related to Figures 4 and 5.** **A.** Fucose utilization pathway. **B.**  $2A^{pduC^*}$  was generated using QuikChange Lightning Multi Site-directed Mutagenesis Kit (Agilent Technologies). **C.** 1,2-propanediol in the binding pocket of PduC. Targeted residues to create catalytically-inactive, isogenic mutant PduC\* are highlighted by yellow boxes.

**D.** Germ-free C57BL/6 WT mice were colonized with  $2 \times 10^9$  CFU of AIEC 2A or  $2A^{\Delta pduC}$  for 5 days and cecal acetate levels were measured. Each dot represents a mouse from one experiment. Error bars represent SEM.  $*p < 0.05$ , ANOVA. **E.** Germ-free *Rag1*-deficient mice were colonized with  $2 \times 10^9$  CFU of AIEC 2A,  $2A^{\Delta pduC}$  or  $2A^{pduC^*}$ . One week after colonization, mice received 500,000 naïve CD4+ T cells I.P. Analysis of CFU/mg cecal contents is shown. Each dot represents an individual mouse from one of two total experiments. Error bars represent SEM.  $*p < 0.05$ , ANOVA. **F,G.** AIEC 2A or  $2A^{\Delta pduC}$  were grown anaerobically in M9-minimal media containing 20 mM L-fucose as the sole carbon source for 72 hours. Cell-free supernatants were used to stimulate bone marrow-derived macrophages (BMDM) for 16h. *Il10* expression was measured by quantitative PCR. Graph shows 3 samples per group from one of three experiments. Error bars represent SEM.  $*p < 0.05$ ,  $**p < 0.01$  ANOVA (**F**). LPS was depleted from cell-free bacterial supernatants using the Pierce™ endotoxin-binding resin in spin-column format. LPS was measured spectrophotometrically using the amebocyte lysate assay (**G**).

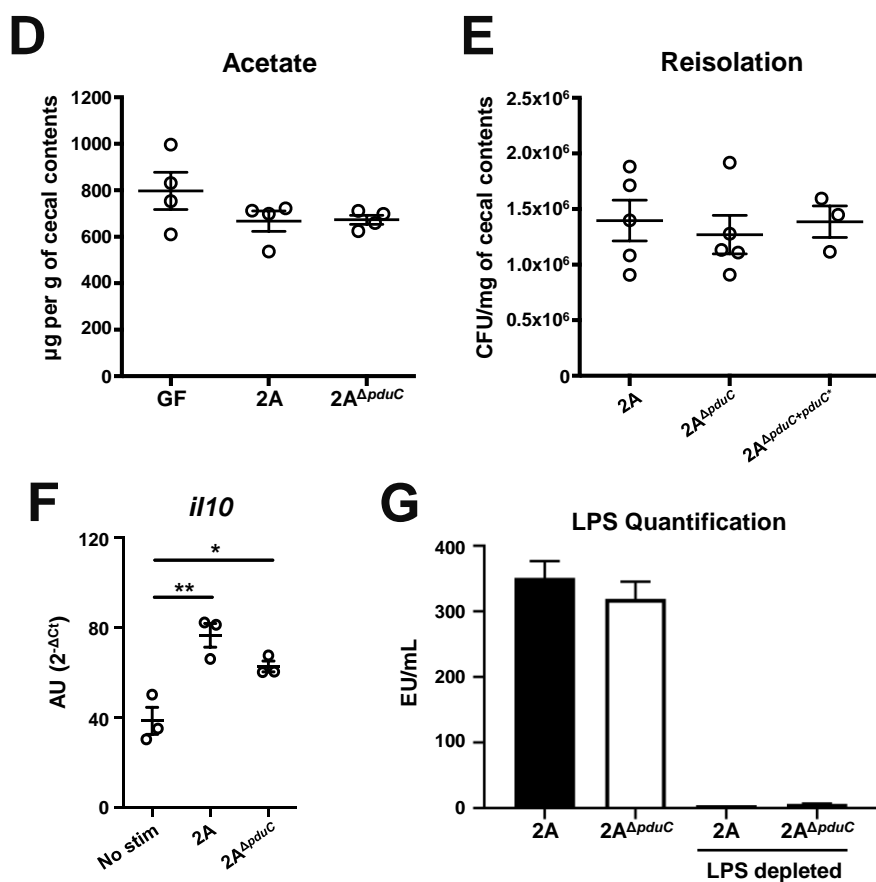

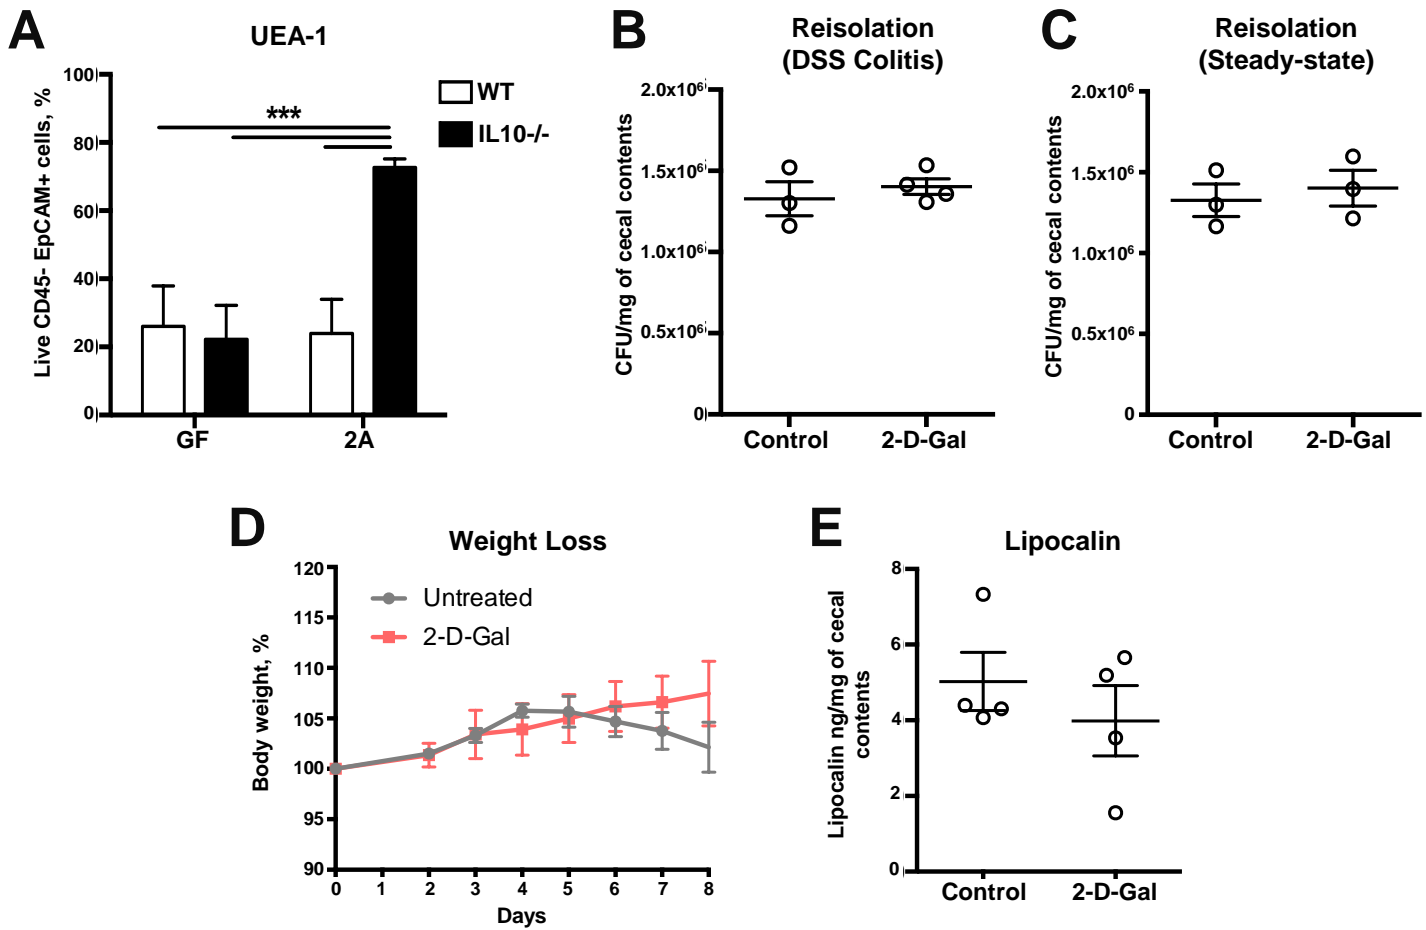

**Fig S6. Regulation of mucosal fucose mediates AIEC pathogenesis in colitis, related to Figure 6.** **A.** Germ-free C57BL/6 and *Il10*-deficient mice were colonized with  $2 \times 10^9$  CFU AIEC 2A or  $2A^{\Delta pduC}$  for 4 days. Ileal epithelial cells were stained for CD45, EpCAM and UEA-I. CD45-EpCAM+ cells were gated and analyzed for UEA-I binding by flow cytometry. Bar graphs represent 4 mice per group. Error bars represent SEM.  $***p < 0.005$  ANOVA. **B.** Germ-free C57BL/6 *Il10*-deficient mice were colonized with  $2 \times 10^9$  CFU of AIEC 2A. Ten days after colonization, mice were exposed to 2% dextran sodium sulfate *ad libitum* for 7 days. Mice were treated intraperitoneally with 2-Deoxy-D-galactose or PBS control on days -2, 0, 2, 4, and 6 of DSS treatment. Bacterial reissolation from cecal contents is shown. **C.** C57BL/6 B6 SPF mice were treated with broad spectrum antibiotics for 2 weeks prior to infection with  $10^{10}$  CFU of AIEC 2A. Mice were treated intraperitoneally with 2-Deoxy-D-galactose or PBS control on days -2, 0, 2, and 4 after infection. Bacterial reissolation from cecal contents is shown. Each dot represents an individual mouse from one of two experiments. Error bars represent SEM.  $*p < 0.05$ , t-test. **D, E.** Germ-free C57BL/6 *Il10*-deficient mice were colonized with  $2 \times 10^9$  CFU of AIEC  $2A^{\Delta pduC}$ . Ten days after colonization, mice were exposed to 2% dextran sodium sulfate *ad libitum* for 7 days. Mice were treated intraperitoneally with 2-Deoxy-D-galactose (2-D-gal) or PBS control on days -2, 0, 2, 4, and 6 of DSS treatment. Percent weight loss (**D**) is shown. Levels of lipocalin in cecal contents was measured by ELISA (**E**). Graphs represent geometric mean of 4 mice per group from one of two total experiments.

**Table S1: Bacterial Strains, Related to STAR methods**

| <b>Bacteria (<i>E. coli</i>)</b>             | <b>Genotype</b>                                                                                                                       | <b>Reference/Source</b>  |
|----------------------------------------------|---------------------------------------------------------------------------------------------------------------------------------------|--------------------------|
| AIEC 2A                                      | Parent strain                                                                                                                         | (Viladomiu et al., 2017) |
| AIEC 2A <sup><i>ΔpduC</i></sup>              | 2A <i>ΔpduC::Km<sup>R</sup></i>                                                                                                       | This work                |
| AIEC 2A<br><i>ΔpduC::tetAsacB</i>            | 2A <i>ΔpduC::tetAsacB</i>                                                                                                             | This work                |
| AIEC 2A<br><i>ΔpduC::tetAsacB</i><br>(pSIM6) | 2A <i>ΔpduC::tetAsacB</i> , pSIM6                                                                                                     | This work                |
| AIEC 2A <sup><i>pduC*</i></sup>              | 2A <i>ΔpduC::tetAsacB::pduC:427C&gt;G,</i><br>428A>C, 509A>C, 1084T>G                                                                 | This work                |
| AIEC 2A <sup><i>+pduC</i></sup>              | 2A <i>ΔpduC::tetAsacB::pduC</i>                                                                                                       | This work                |
| BL21(DE3)                                    | F <sup>-</sup> <i>ompT hsdS<sub>B</sub> (r<sub>B</sub><sup>-</sup> m<sub>B</sub><sup>-</sup>) gal dcm</i> (DE3);<br>PduCDE expression | Novagen                  |
| T-SACK                                       | W3110 <i>araD&lt;&gt;tetA-sacB-amp fliC&lt;&gt;cat</i><br><i>argG::Tn5</i> ; cassette amplification                                   | Court lab, NCI           |
| <i>Bacteroides</i><br><i>thetaoitamicon</i>  | Wild-type                                                                                                                             | (Benjdia et al., 2011)   |

Strains of bacterial used or generated for this manuscript. Italics designate a gene.

**Table S2: Plasmids, Related to STAR methods**

| <b>Plasmid</b> | <b>Genetic Info</b>                                                                    | <b>Reference/Source</b> |
|----------------|----------------------------------------------------------------------------------------|-------------------------|
| pSIM6          | <i>exo</i> , <i>bet</i> , <i>gam</i> , Amp <sup>R</sup> ,<br><i>repA</i> <sup>Ts</sup> | Court lab, NCI          |
| pUC19          | PCR cloning vector                                                                     | NEB                     |
| pET30b         | PduCDE expression<br>vector, Km <sup>R</sup>                                           | Novagen                 |

Plasmids used for this manuscript. Italics designate a gene.



**Table S3: Oligonucleotides, Related to STAR methods**

| Primers              | Sequence (5' → 3')                                                                       | Purpose                                                                              | Reference/ Source |
|----------------------|------------------------------------------------------------------------------------------|--------------------------------------------------------------------------------------|-------------------|
| Kan + pduC F         | CGATACACCGAAAAACGATCGCCC<br>TTCCTACATCTGAATTCTCTGAGGC<br>AGATTTTATGGACAGCAAGCGAAC<br>CG  | $\lambda$ Red Recombination, pdu<br>homology for Km <sup>R</sup><br>amplification    | This work         |
| Kan + pduC<br>R      | GCACGCCTTCGATAATCTGACGCA<br>GTAATTTTTCGTTAATTTCCATTTCT<br>CACCTCAGAAGAACTCGTCAAGA<br>AGG | $\lambda$ Red Recombination, pdu<br>homology for Km <sup>R</sup><br>amplification    | This work         |
| Kan + pduC<br>ext F  | CATCTCCGCACGCGAAATCGGTAA<br>AACAGTGCTTTCGACTCTCGGCGA<br>TACACCGAAAAACGATC                | pdu homology extension                                                               | This work         |
| Kan + pduC<br>ext R  | GCACGAAATGAAACGGACTTGTCTG<br>CTGGTTTGCATTTCTGCCAGCAGC<br>CCTTCGATAATCTGAC                | pdu homology extension                                                               | This work         |
| TetA + pduC<br>F     | CACCGAAAAACGATCGCCCTTCT<br>ACATCTGAATTCTCTGAGGCAGATT<br>TTCTAATTTTTGTTGACTCTATC          | $\lambda$ Red Recombination, pdu<br>homology for <i>tetA-sacB</i><br>amplification   | This work         |
| TetA + pduC<br>R     | CCTTCGATAATCTGACGCAGTAATT<br>TTTCGTTAATTTCCATTTCTCACCC<br>ATCAAAGGGAAAACGTCCATATG<br>C   | $\lambda$ Red Recombination, pdu<br>homology for <i>tetA-sacB</i><br>amplification   | This work         |
| TetA + pduC<br>ext F | CGCGAAATCGGTAAAACAGTGCTT<br>TCGACTCTCGGCGATACACCGAAA<br>AACGATC                          | pdu homology extension                                                               | This work         |
| TetA + pduC<br>ext R | CGGACTTGTCTGCTGGTTTGCATTT<br>CTGCCAGCACGCCTTCGATAATCT<br>GACG                            | pdu homology extension                                                               | This work         |
| KmR F                | TATGGACAGCAAGCGAACCG                                                                     | Km <sup>R</sup> cassette detection                                                   | Court lab,<br>NCI |
| KmR R                | GAAGGCGATAGAAGGCG                                                                        | Km <sup>R</sup> cassette detection                                                   | This work         |
| TetA-SacB F          | TCCTAATTTTTGTTGACTC                                                                      | <i>tetA-sacB</i><br>amplification/detection                                          | Court lab,<br>NCI |
| TetA-SacB R          | ATCAAAGGGAAAACGTCC                                                                       | <i>tetA-sacB</i><br>amplification/detection                                          | Court lab,<br>NCI |
| pduC F               | ATGAGATCGAAAAGATTTGAAGC                                                                  | <i>pduC</i> amplification/detection                                                  | This work         |
| pduC R               | TTAGTCAATTTTCGTTGGGATC                                                                   | <i>pduC</i> amplification/detection                                                  | This work         |
| RS-pduC F            | GAAATCAAGCTTGGTAAAACAGTG<br>CTTTCGAC                                                     | Amplify <i>pduC</i> with HindIII<br>restriction site for<br>incorporation into pUC19 | This work         |
| RS-pduC R            | CGGAGGATCCCTTGTCGCTGGTTT<br>GCATTTT                                                      | Amplify <i>pduC</i> with BamHI<br>restriction site for<br>incorporation into pUC19   | This work         |
| H143A                | GAACACCATCACAACAGGCTGCCG<br>TCACCAACATCAAAG                                              | Site-directed mutagenesis<br>primer                                                  | This work         |

|             |                                         |                                                                                         |           |
|-------------|-----------------------------------------|-----------------------------------------------------------------------------------------|-----------|
| E170A       | CGGGTTTGATGAACAGGCAACCAC<br>TGTAGCCGTTG | Site-directed mutagenesis<br>primer                                                     | This work |
| S362A       | GCCAGGTACCGACTTTATCTCTGC<br>CGGTTTTTCCG | Site-directed mutagenesis<br>primer                                                     | This work |
| pduC* F     | GGTAAAACAGTGCTTTTCG                     | Amplification of <i>pduC*</i> for<br>recombination into genome                          | This work |
| pduC* R     | CTTGTCGCTGGTTTGC                        | Amplification of <i>pduC*</i> for<br>recombination into genome                          | This work |
| RS-pduC 2 F | GGACATATGAGATCGAAAAGATTT<br>GAAGC       | Amplify <i>pduCDE</i> with NdeI<br>restriction site for<br>incorporation into pET30b    | This work |
| RS-pduC 2 R | TCGAAGCTTTTAATCGTCGCCTTTC<br>AG         | Amplify <i>pduCDE</i> with HindIII<br>restriction site for<br>incorporation into pET30b | This work |

Oligonucleotides sequences used to generate the bacterial strains in this manuscript.
